# Supplementary material
Source: PubMed Central journal article supplement (PMC3603518)
Supplement: supp_126.1.234_JCS113795.pdf [file supp_126.1.234_JCS113795.pdf]

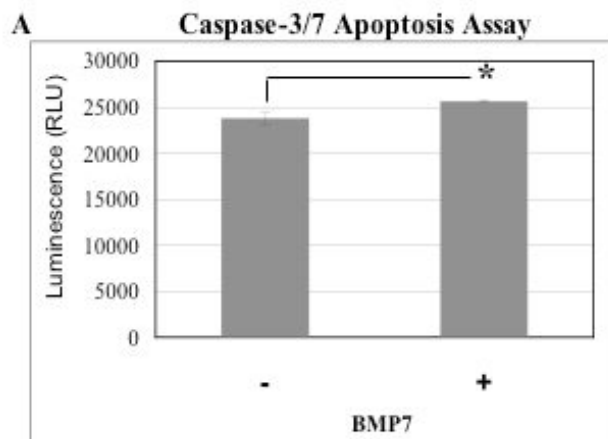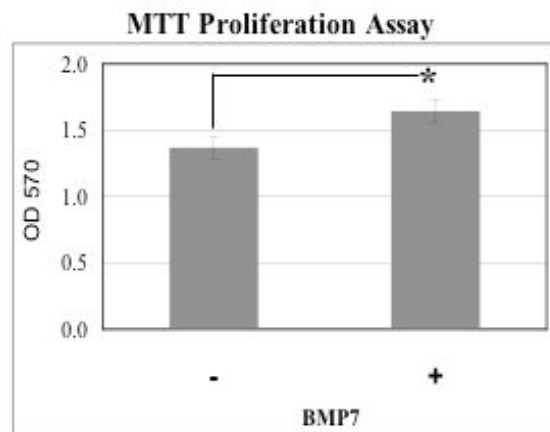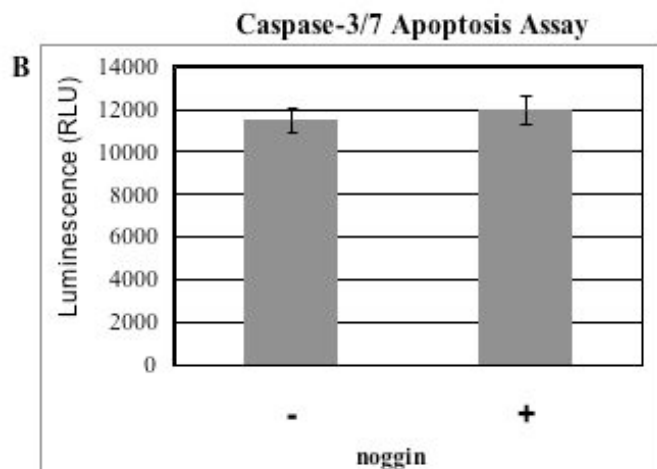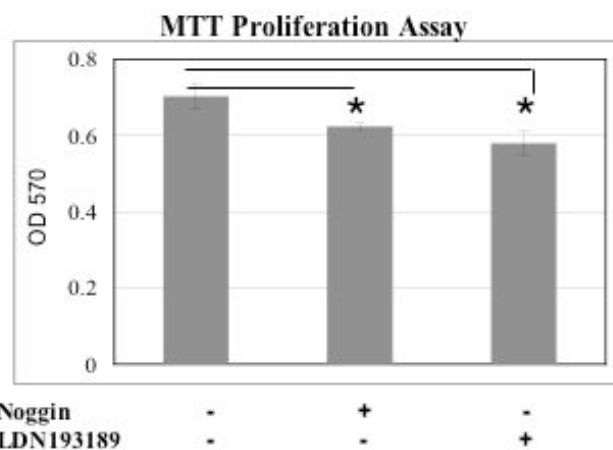

**Supplemental Figure 1. The effect of altered BMP signaling on wild-type primary chondrocyte proliferation and apoptosis.** Postnatal day 3 primary rib chondrocytes from wild-type mice were cultured for 2 days and then treated for 48 hours with 100ng/ml BMP7 (A), 0.5 $\mu$ g/ml Noggin or 200nM LDN193189 (B). Cell proliferation was measured by MTT assay (left panel), and etoposide-stimulated caspase-3/7 activity of apoptosis was measured by Caspase-Glo3/7 assay (right panel). \*  $p < 0.05$  between treated vs untreated groups. N=4 per group.

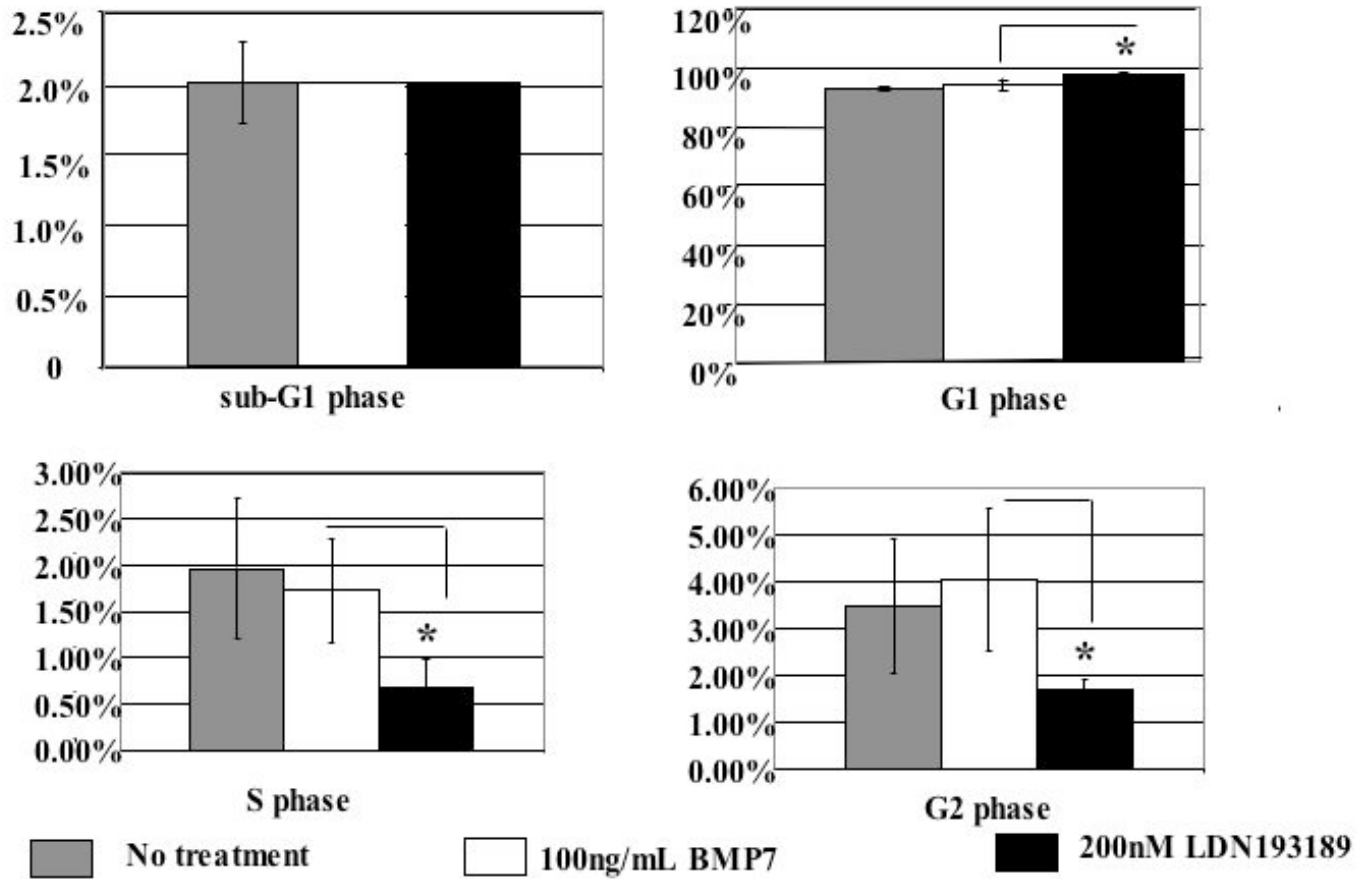

**Supplemental Figure 2. Significant difference in cell cycle progression between BMP7-treated and LDN193189-treated chondrocytes.** Postnatal day 3 primary rib chondrocytes from wild-type mice were cultured for 2 days and then treated for 48 hours with 100ng/ml BMP7 (A) or 200nM LDN193189 (B). Afterwards, propidium iodide-based cell cycle analysis was performed with a flow cytometer. \* p<0.05 between BMP7-treated groups (empty box) vs LDN193189-treated groups (black box) N=5 per group.

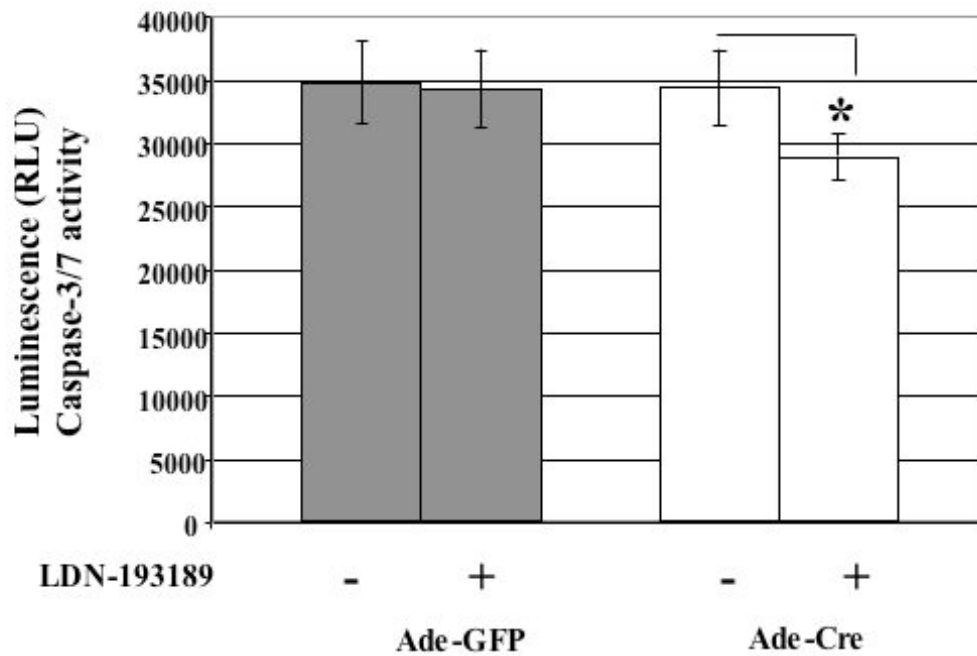

**Supplemental Figure 3. The BMP inhibitor LDN193189 reduced caspase-3/7-mediated apoptosis in *Jab1*-knockdown chondrocytes.**

Primary rib chondrocytes of postnatal day 3 *Jab1<sup>flacZlox</sup>* mice were infected with adenovirus expressing Cre (Ade-Cre) or green fluorescent protein (Ade-GFP). Cells were cultured for 5 days, followed by 48-hour treatment of 200nM LDN193189. Afterwards, etoposide-stimulated caspase-3/7 activity of apoptosis was measured by Caspase-Glo3/7 assay (right panel). LDN193189 significantly decreased caspase-3/7 activity in primary chondrocytes infected with Ade-Cre, but had no effect on primary chondrocytes infected with control Ade-GFP. \*  $p < 0.05$  N=5 per group.

Table S1. Primers used in real time RT-PCR analyses

| Gene          | Primers*                                            | Size (bp) | Accession No. |
|---------------|-----------------------------------------------------|-----------|---------------|
| <i>Gdf10</i>  | GAAGTACAACCGAAGAGGTGC<br>AGGCTTTTGGTCGATCATTTC      | 88        | NM_145741     |
| <i>Id1</i>    | AAAGCGTGGCCATCTCGCGC<br>GGCACTGATCTCGCCGTTCAAG      | 293       | NM_010495     |
| <i>Ihh</i>    | TTCAAGGACGAGGAGAACACG<br>ATTTCGGTCACGGTCTGAGG       | 213       | NM_010544     |
| <i>Jab1</i>   | TTGCATCTTGATTGTGGAGCGAC<br>CAGTATTTAAAGTAGTGGTGATCC | 208       | NM_013715     |
| <i>Smad7</i>  | GGCCGGATCTCAGGCATTC<br>TTGGGTATCTGGAGTAAGGAGG       | 153       | NM_001042660  |
| <i>Snail2</i> | CAGCGAACTGGACACACACA<br>ATAGGGCTGTATGCTCCCGAG       | 111       | NM_011415     |
| <i>Gapdh</i>  | ATGGGAAGCTTGTCATCAAC<br>GTGGTTCACACCCATCACAA        | 221       | NM_008084     |

\*All primer sequences are presented from 5' to 3'. For each gene, the top sequence is the sense primer, and the bottom sequence is the anti-sense primer.

**Table S2.** Primary antibodies for Immunohistochemistry (IHC) and Western blotting (WB) in this study

| <b>Name</b>            | <b>Type</b>           | <b>Company</b> | <b>Dilution/Applications</b> |
|------------------------|-----------------------|----------------|------------------------------|
| Jab1                   | Rabbit polyclonal IgG | Santa Cruz     | 1:100 (IHC); 1:200 (WB)      |
| $\gamma$ -tubulin      | Mouse monoclonal IgG1 | Sigma-Aldrich  | 1:100 (WB)                   |
| Phospho-Smad1/5        | Rabbit monoclonal IgG | Cell Signaling | 1:50 (IHC); 1:100 (WB)       |
| Phospho-Smad2/3        | Rabbit monoclonal IgG | Cell Signaling | 1:100 (WB)                   |
| Total Smad1/5          | Mouse monoclonal IgG  | Santa Cruz     | 1:500 (WB)                   |
| Runx2                  | Goat polyclonal IgG   | Santa Cruz     | 1:200 (IHC)                  |
| Runx2                  | mouse monoclonal IgG  | MBL            | 1:200 (WB)                   |
| Skp1                   | Rabbit monoclonal IgG | Epitomics      | 1:100 (WB)                   |
| p27 <sup>Kip1</sup>    | Rabbit polyclonal IgG | Cell Signaling | 1:100 (WB)                   |
| Csn3                   | Rabbit monoclonal IgG | Epitomics      | 1:100 (WB)                   |
| I $\kappa$ B- $\alpha$ | Rabbit monoclonal IgG | Epitomics      | 1:100 (WB)                   |
| Gdf10                  | Rabbit monoclonal IgG | Epitomics      | 1:100 (WB)                   |
| Xpress                 | mouse monoclonal IgG  | Invitrogen     | 1:500 (WB)                   |
| Flag                   | mouse monoclonal IgG  | Sigma          | 1:500 (WB)                   |
